# Supplementary material for: Dihalogen-templated synthesis of dodecanuclear silver dichalcogenophosphate clusters
Source: Royal Society of Chemistry journal article supplement (doi:10.1039/c3ce40829a), 2013-01-01
Supplement: c3ce40829a.pdf [file c3ce40829a.pdf]

## Supporting Information

### Dihalogen-templated synthesis of dodecanuclear silver dichalcogenophosphate clusters

Bing Li, Jian-Hong Liao, Yi-Juan Li, and C. W. Liu\*

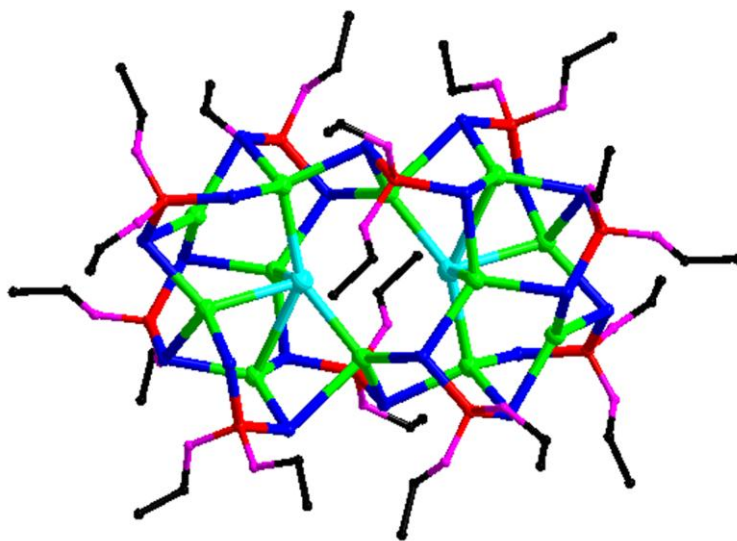

**Figure S1.** Structure of  $\text{Ag}_{12}(\mu_5\text{-X})_2[\text{E}_2\text{P}(\text{OEt})_2]_{10}$  ( $\text{X} = \text{Br}$ ,  $\text{E} = \text{S}$ , **1**;  $\text{X} = \text{I}$ ,  $\text{E} = \text{S}$ , **2**;  $\text{X} = \text{I}$ ,  $\text{E} = \text{Se}$ , **3**) (Ag, green; S/Se, blue; P, red; C, Black; O, purple; Br/I, turquoise). Hydrogen atoms are omitted for clarity.

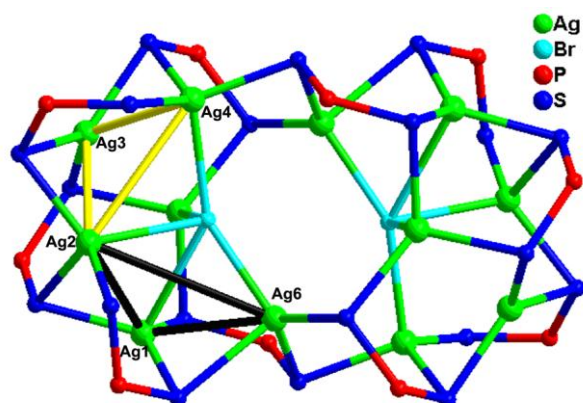

**Figure S2.** Black and yellow lines represent the edges of  $\text{Ag1-Ag2-Ag6}$  and  $\text{Ag2-Ag3-Ag4}$  triangles, respectively. Ethoxy groups are omitted for clarity.

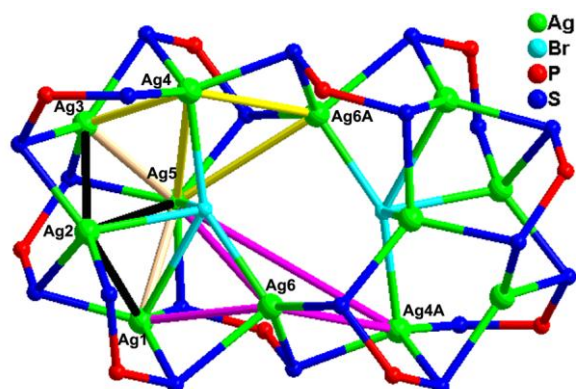

**Figure S3.** Black, yellow, and purple lines represent the edges of three  $Ag_4$  butterflies, respectively ( $Ag1-Ag2-Ag3-Ag5$ ,  $Ag3-Ag4-Ag5-Ag6A$ , and  $Ag1-Ag5-Ag6-Ag4A$ , symmetry codes: A=  $1-x$ ,  $1-y$ ,  $-z$ ). Ethoxy groups are omitted for clarity.

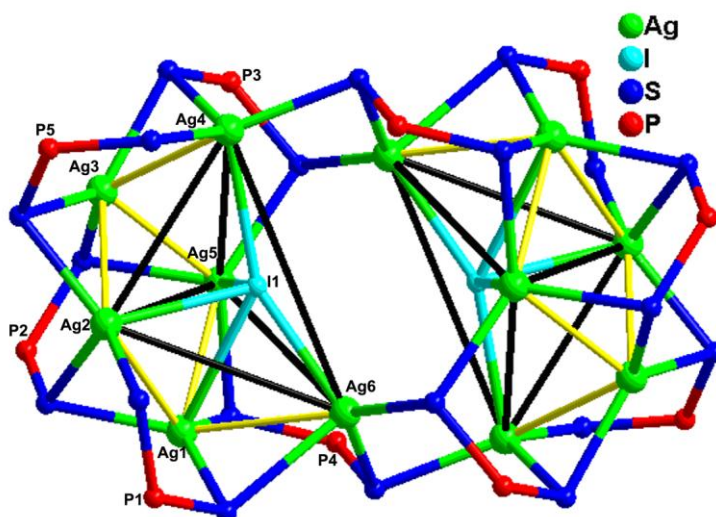

**Figure S4.** Structure of  $Ag_{12}(\mu_5-I)_2[S_2P(OEt)_2]_{10}$ . The black and yellow lines represent the edges of a tetrahedron and the edges of the capping slivers to vertices of the tetrahedron, respectively. Ethoxy groups are omitted for clarity.

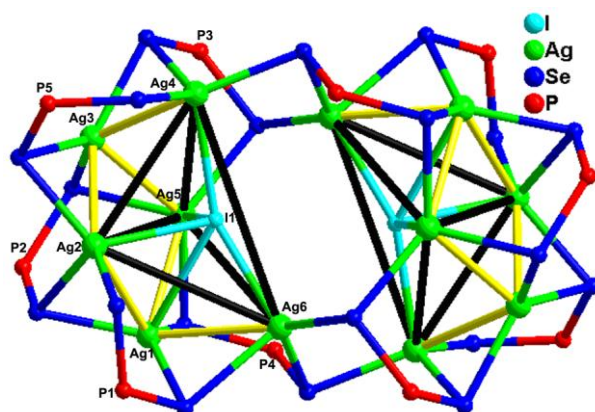

**Figure S5.** Structure of  $\text{Ag}_{12}(\mu_5\text{-I})_2[\text{Se}_2\text{P}(\text{OEt})_2]_{10}$ . The black and yellow lines represent the edges of a tetrahedron and the edges of the capping slivers and vertices of the tetrahedron, respectively. Ethoxy groups are omitted for clarity.
